# Supplementary material for: Drought responsive gene expression regulatory divergence between upland and lowland ecotypes of a perennial C4 grass
Source: PubMed Central journal article supplement — Genome Res. 2016 Apr;26(4):510–8. doi: 10.1101/gr.198135.115 (PMC4817774; doi:10.1101/gr.198135.115), 2016-04
Supplement: supp_gr.198135.115_Supplemental_Material.pdf [file supp_gr.198135.115_Supplemental_Material.pdf]

**TABLE OF CONTENTS:**

1  
2  
3  
4  
5  
6  
7  
8  
9  
10  
11  
12  
13  
14  
15  
16  
17  
18  
19  
20  
21  
22  
23  
24  
25  
26  
27  
28  
29  
30  
31  
32  
33  
34  
35  
36  
37  
38  
39  
40  
41  
42  
43  
44  
45  
46  
47  
48  
49  
50  
51

- I. Supplemental Methods:
  - 1. Analytical Pipeline
  - 2. Experimental design details
  - 3. Assessment of experimental conditions
  - 4. Processing of counts data
  - 5. Estimation of mapping bias
  - 6. Model specification
  - 7. Multiple testing correction methodology
  - 8. Motif enrichment analytical pipeline
- II. Comparison of cis-trans test methodologies
  - 1. Comparison to traditional binomial tests
  - 2. Comparison of fixed effects models between LIMMA and DESeq2
  - 3. Discussion of the effects of plant ID as a blocking factor.
- III. Supplementary Figures
  - 1. Figure S1. Climatic context of 2013 drought.
  - 2. Figure S2. Qualification of mapping bias.
  - 3. Figure S3: Distribution of heterosis effects across differential expression and GxE categories.
  - 4. Figure S4. Comparison between linear modeling and traditional cis-trans test analyses.
  - 5. Figure S5. Comparison total and ASE transcript counts in the F<sub>0</sub> and F<sub>1</sub> generations.
  - 6. Figure S6. Counts and reaction norms of cis\*treatment interactions.
  - 7. Figure S7. Counts and reaction norms of trans effects. The
  - 8. Figure S8. Reaction norms across the 12 genes significantly affected by trans\*treatment interactions.
  - 9. Figure S9. Comparison between LIMMA and DESeq2 models for the estimation of cis, trans and their interactions with treatment.
  - 10. Figure S10. Comparison of LIMMA model fits.
- IV. Supplementary Tables
  - 1. Table S1 Caption
  - 2. Table S2 Caption
- V. References in the supplementary material

\* Table S1 and S2 can be found in separate files.

**I: SUPPLEMENTAL METHODS:**

**1) Analytical Pipeline.**

The R scripts to conduct this analysis were posted on github (<https://github.com/jtlovell/cis-trans-test>). The steps that make up each analysis are described briefly below and annotated more completely in the scripts posted on github.

**2) Experimental design details.**

The parents and F<sub>1</sub> hybrids were planted in the field on October 12, 2012 as part of a larger experiment. The field experimental site was located in a prairie field (30.182° N, 97.879° W) at the south end of the Ladybird Johnson Wildflower Center (Austin, TX). Prior to planting, the

52 field was covered with Sunbelt Weed Fabric (Peaceful Valley Farms, Grass Valley, CA). For  
53 planting, we cut holes in the cloth and used a mechanical auger to drill holes in the soil. Plants  
54 were transferred from 3.79L pots into the holes. Plants were arrayed into rows that were two  
55 plants wide, with 1.2m wide walking paths between rows to allow for easy access to plants for  
56 sampling. Plants were spaced 40 cm apart from each other along rows. The full design included  
57 1000 fully randomized plants, of which the parents (N = 100 FIL2, 100 HAL2) and F<sub>1</sub>s (N = 30)  
58 were a subset. Due to exceptionally low rainfall in the fall of 2012, we watered plants as needed  
59 through November and early December to ensure establishment. Irrigation was ceased once  
60 plants entered winter dormancy. The experimental plants emerged from dormancy in the spring of  
61 2013 and were grown without manipulation until early July. Plants grew vigorously through April  
62 and May, as rainfall was abundant in those months (LBJ Wildflower Center Weather Station  
63 Data: April = 80.0 mm; May = 93.5 mm; Fig. 1). However, this period was followed by a  
64 prolonged hot and dry period, where only 5.08 mm of rainfall fell between 26-May and 7-July.  
65  
66

### 67 **3) Assessment of experimental conditions:**

68 Daily maximum air temperature and total precipitation were requested and downloaded from the  
69 National Oceanic and Atmospheric Administration (NOAA) web portal  
70 (<https://www.ncdc.noaa.gov/cdo-web/>) the most proximate weather stations to the collections  
71 sites of HAL2 and FIL2. Data for each year over the span of the experiment were parsed from  
72 these data files. Kernel density distributions for each climate variable were calculated using the R  
73 base function *density* and the percentile distribution of the 2013 drought were compared for each  
74 dataset. Local weather station data was available for 2013 at the site of the experiment. These  
75 data augmented our broader scale climate data.  
76  
77

### 78 **4) Processing of counts data:**

79 Libraries were compared by the relative expression of HAL2- and FIL2- allele-specific-  
80 expression (ASE). Lines with studentized residuals from the linear model (HAL2 ASE ~ FIL2  
81 ASE) within each genotype (HAL2, FIL2, and F<sub>1</sub>) that gave bonferoni-adjusted *p*-values (*t* test) <  
82 0.0001 were excluded from all further analyses. This was accomplished using the function  
83 *outlierTest* in the R package *car* (Fox and Weisberg 2010). Genes with mean counts across all  
84 samples < 5 were also excluded from all further analyses. We then assessed ASE of the genes  
85 with >5 total counts and culled by two criteria. For a gene to be incorporated into our modeling of  
86 cis- and trans- acting expression regulation, genes had to have >5 mean FIL2 ASE counts in the  
87 FIL2 genotype and >5 mean HAL2 ASE counts in the HAL2 genotype. Furthermore, the mean  
88 HAL2 ASE counts in FIL2 genotypes and the mean FIL2 ASE counts in HAL2 genotypes had to  
89 be >1% of the FIL2 ASE counts in the FIL2 genotype and the HAL2 ASE counts in the HAL2  
90 genotype respectively. These criteria assured that all genes analyzed had sufficiently precise and  
91 quantifiable ASE.  
92  
93

94 **5) Estimation of mapping bias:** Many analysis of ASE are sensitive to mapping bias. We  
95 corrected for these effects by treating ASE from each plant and allele as its own library in the  
96 DESeq2 pipeline. As such, the FIL2 and HAL2 ASE are each normalized with regards to the total  
97 number of counts assigned to each bin. Despite these efforts, extreme mapping bias may still  
98 introduce statistical artifacts into our analysis. To test mapping bias, we compared the mean  
99 number of mapped reads for each allele, for each gene. If the linear correlation falls near a slope  
100 of 1, this is an indication that mapping bias is not extreme. Indeed, this is the case (Fig. S6). We  
101 find very little evidence of mapping bias.  
102

103

104 **6) Model Specification:**

105 Our model fit treatment (drought, recovery), genotype (FIL2, HAL2) and their interaction while  
 106 controlling for sampling scheme. Assessment of differential expression was conducted by fitting  
 107 two distinct models in *DESeq2*, one with total counts as the response variable and another with  
 108 allele-specific counts (ASE). In each model, we corrected for the time of sampling by  
 109 categorizing tissue harvest as early (in the first 50% of sampling) or late (in the last 50% of  
 110 sampling). This categorical time variable was retained as the first term in all DESeq2 models to  
 111 account for circadian variation in the linear models.

112

113 In the first model, we quantified differential expression in the context of genotype, environment  
 114 and GxE between the parental genotypes, FIL2 and HAL2 (Fig. 2a). Genes were retained for the  
 115 analysis if mean total counts were > 5, resulting in a total of 22,322 genes analyzed. For each  
 116 gene we fit the standard negative binomial linear model DESeq2 pipeline (Love et al. 2013; 2014)  
 117 with:

118

119

MODEL 1:

120

$$\log_2 q_{ij} = \beta_0 + \beta_D D_i + \beta_T T_i + \beta_A A_i + \beta_{TA} T_i * A_i$$

121

122 where for individual  $i$  and gene  $j$ ,  $D_i = 1$  if the sample was collected late in the day and 0 if it was  
 123 collected early in the day,  $T_i = 1$  if the sample is a recovery treatment sample and 0 if it is a  
 124 drought treatment sample, and  $A_i = 1$  if the sample genotype allele is HAL2 and 0 if it is FIL2.

125

126 This analysis permitted the estimation of conserved genes that have similar responses across all  
 127 individuals and environments (conserved), genes with expression that differs between the  
 128 environments and/or genotypes, or genes that are differentially affected by the environment,  
 129 depending on the genotype (GxE).

130

131 We quantified heterosis by including total counts of  $F_1$  genotypes in MODEL 1. As such this  
 132 model is a simple expansion of Model 1, where A has three levels (HAL2, FIL2 and  $F_1$ ). From  
 133 this model, we conducted specific contrasts between the three genotypes and binned each gene  
 134 into one of the seven heterosis categories (Table 1) via a custom R script.

135

136 To quantify the degree of cis- and trans-acting expression modifiers, we again fit the standard  
 137 DESeq2 model to allele-specific expression of HAL2, FIL2 and the  $F_1$  hybrid, but with:

138

139

MODEL 2:

140

$$\log_2 q_{ij} = \beta_0 + \beta_D D_i + \beta_T T_i + \beta_A A_i + \beta_G G_i + \beta_{TA} T_i * A_i + \beta_{TG} T_i * G_i + \beta_{AG} A_i * G_i + \beta_{TAG} T_i * A_i * G_i$$

141

142 where for individual  $i$  and gene  $j$ ,  $D_i = 1$  if the sample was collected late in the day and 0 if it was  
 143 collected early in the day,  $T_i = 1$  if the sample is from the recovery treatment and 0 if it is from  
 144 the drought treatment,  $A_i = 1$  if the count is for the HAL2 allele and 0 if the count is for the FIL2  
 145 allele and  $G_i = 1$  if the sample from the  $F_0$  generation and 0 if it is from the  $F_1$  generation.

146

147 Under the MODEL 2 specification,  $\beta_A$  estimates the allele contrast within the  $F_1$  generation, which  
 148 corresponds to the classic cis-test notion of allelic imbalance:  $A(F_1)/B(F_1)$ . The interaction term  
 149  $\beta_{AG}$  can be interpreted as a difference of differences -- the difference between allele contrasts  
 150 between generations -- which corresponds to the classic trans-test notion:

151

152

$[A(F_1)/B(F_1)]/[A(F_0)/B(F_0)]$ . We also fit MODEL 2 within each environment, to present the  
 similarity of our analysis to traditional cis-trans tests (Figs. S4-5).

153

154 It is important to note that the estimation of cis/trans expression regulation is not identical to  
 155 measuring differential expression. The test of allelic imbalance (Fig. 2a) is a specific contrast:

156

157 allele = FIL2 & generation = F<sub>0</sub> (FIL2-F<sub>0</sub>) vs. HAL2-F<sub>0</sub>.

158

159 However, the cis-test is coded so that we contrast:

160

161 FIL2-F<sub>1-ASE</sub> vs. HAL2-F<sub>1-ASE</sub>,

162

163 and the trans test assesses the allele\*generation interaction by contrasting the dependency of  
 164 allelic imbalance on generation so that:

165

166 slope(FIL2-F<sub>1-ASE</sub> vs. HAL2-F<sub>1-ASE</sub>) vs. slope(FIL2-F<sub>0-ASE</sub> vs. HAL2-F<sub>0-ASE</sub>).

167

168 Finally, it is important to define the cases where this approach lacks power to detect cis, or trans  
 169 effects. The most common pattern occurs where significant differential expression exists between  
 170 the parental genotypes and differential expression exists in the same direction, but is no longer  
 171 significant in the F<sub>1</sub> generation. In this case, the cis and trans effects are antagonistic, causing our  
 172 model to detect differential expression between the parents. However, we would be unable to  
 173 attribute this divergence to either cis, or trans effects. In fact, this pattern is quite common among  
 174 genes, indicating that both cis and trans acting gene expression regulation exists, but neither has a  
 175 strong enough effect to be detected via linear modeling (Fig. S4).

176

177 **7) Multiple testing correction methodology:**

178 Gene-by-gene statistical analysis such as the linear modeling presented here conducted many  
 179 independent tests, and therefore required multiple testing corrections to maintain an acceptable  
 180 experiment-wise false discovery rate. Here, we used the R package *qvalue* (Storey 2002) to  
 181 transform *p*-values into *q*-values that account for the distribution of *p*-values and the number of  
 182 tests.

183

184 For each set of *p*-values, we removed any NA's, then calculated the *q*-value distribution as well  
 185 as the estimated proportion of true null hypotheses ( $\pi_0$ ), which was estimated with the “bootstrap”  
 186 method (Storey et al. 2004).

187

188 **8) Promoter motif enrichment analytical pipeline:**

189 A set of 485 annotated and published plant promoter motifs were downloaded from the  
 190 newPLACE (Higo et al. 1999) database (<http://www.dna.affrc.go.jp/PLACE/>) on 9-December  
 191 2015. These motif sequences were converted into probability matrices via a custom algorithm and  
 192 read into the R package PWMEnrich (Frith et al. 2004).

193

194 Promoter sequences from all *P. hallii* gene models were downloaded from the Phytozome server  
 195 (<http://phytozome.jgi.doe.gov/pz/portal.html>) on 10-December 2015. We developed the  
 196 background distribution of motifs on a random subset of 2000 promoter sequences using the  
 197 function makePWMLognBackground. This background distribution was used to generate *p*-  
 198 values for all motif analyses. We conducted promoter motif enrichment analyses on 7 subsets of  
 199 genes. For each set of genes, we conducted motif enrichment analyses in the PWMEnrich  
 200 package using the following parameters: scoring via the “affinity” method and background  
 201 correction through the *logn* method. *P*-values were transformed to *q*-values using the R package  
 202 *qvalue* (Storey 2002).

203

## II: COMPARISON OF CIS-TRANS TEST METHODOLOGIES

### **1) Comparison to traditional binomial tests:**

We implemented the methods of Wittkopp et al. (2004), who utilized a Mann-Whitney t-test to quantify the effects of cis and trans variation using the R base function *wilcox.test*. More recently, the cis-trans test has also been conducted using exact binomial tests, which we implemented using the R base function *binom.test*. *P*-value ranks for these two tests and our negative binomial linear model are presented in Figure S4.

### **2) Comparison of modeling in DESeq2 and LIMMA:**

An important consideration is that the HAL2 and FIL2 alleles in the F<sub>1</sub> plants are not independent. While normalization in DESeq2 accounts for differential library size, other factors, such as the specific attributes of the plant, soil characteristics, pests etc. may cause correlations between the alleles in the F<sub>1</sub> plants. As such, it may be appropriate to account for such correlations using a mixed effects model where the ID of each plant (Plant ID) is a blocking factor. Of particular concern would be any case where the estimated effects of a gene are biased in the DESeq2 approach, but are not significant when plant ID is accounted for.

LIMMA is a differential expression analysis package originally designed for microarray experiments. We originally opted for DESeq2 over LIMMA for several reasons: 1) DESeq2 is designed explicitly for RNA-seq datasets (Love et al. 2014), 2) it good FDR control when many biological replicates are present (Soneson and Delorenzi 2013), 3) there is precedent for the analysis of cis and trans factors in DESeq2 (Bader et al. 2015). However, DESeq2 does not offer mixed effects modeling, a drawback that makes it impossible to fit plant ID as a term in the model. LIMMA does permit fitting a model with a random a blocking factor.

However, LIMMA has several drawbacks that make us hesitant to exploit this approach. First, LIMMA fits a common correlation among all levels of random effects. Since our blocking factors occur across diverse sampling times and experimental treatments, it is not clear if this approach is appropriate. Second, LIMMA only permits a single blocking factor, whereas here, we would prefer to fit both time of sampling and unique plant ID as random effects. Finally, the blocking effect in LIMMA was originally designed for technical replicates (e.g. multiple arrays). It is not clear how this approach may perform using a blocking factor, like plant ID with 88 levels.

We first compared identical models in DESeq2 and LIMMA (Fig. S9). Clearly the results are similar, but DESeq2 offers significantly greater power for the estimation of all model contrasts.

### **3) Comparison of modeling with and without Plant ID as a blocking factor:**

To test for the significance of the effect of blocking by plant ID, we implemented our model in LIMMA, accounting for the correlation due to the unique plant, and using plant ID as a blocking factor. We then merged these results with the DESeq2 results and plotted the resultant data. It is clear that the LIMMA approach dramatically improves power to detect both cis and trans effects (Fig S10); however, it is not clear if this more complex model accurately fits the data.

To assess this, we looked at the residual variance of the two models in LIMMA. Combined, the residual variance was reduced by 1.6% (median) in the model with plantID as a blocking effect. We conclude that the difference between models is very modest difference. Due to its increased power and simplicity, we opted for the DESeq2 fixed model over either of the LIMMA models.

255

**III: SUPPLEMENTARY FIGURES**

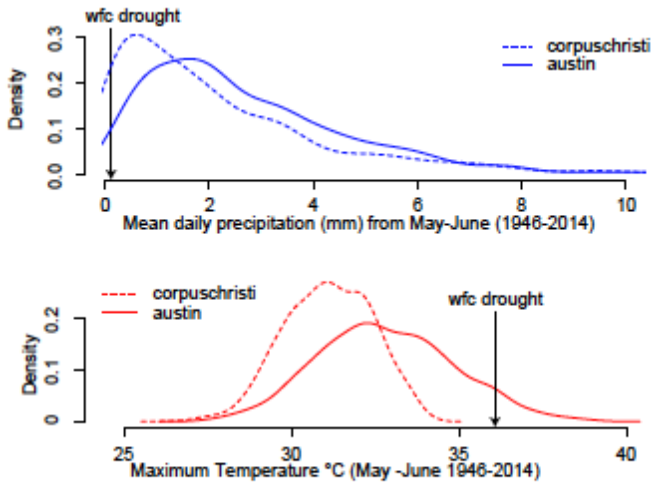

256  
257  
258  
259  
260  
261  
262  
263

**Figure S1. Climatic context of 2013 drought.** The native habitats of HAL2 and FIL2 are separated by 280km, but exhibit markedly different historical climates during the study period, as indicated by the amount of precipitation in the warmest quarter. The density distributions of mean daily precipitation (a) and mean maximum temperature (b) for each year from 1946-2014 are plotted for each site. The point estimate of the 2013 drought intensity relative to each site is plotted as a vertical arrow

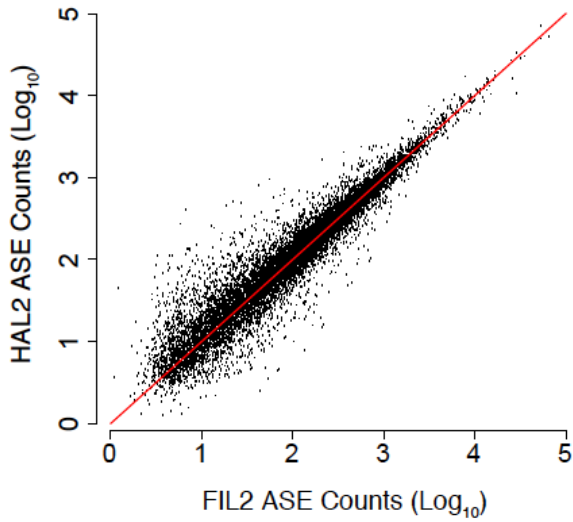

264  
265  
266  
267  
268  
269

**Figure S2. Qualification of mapping bias.** Mean number of mapped reads to FIL2 and HAL2 alleles are plotted on log<sub>10</sub> scales. The red line indicates a 1:1 mapping ratio (no mapping bias).

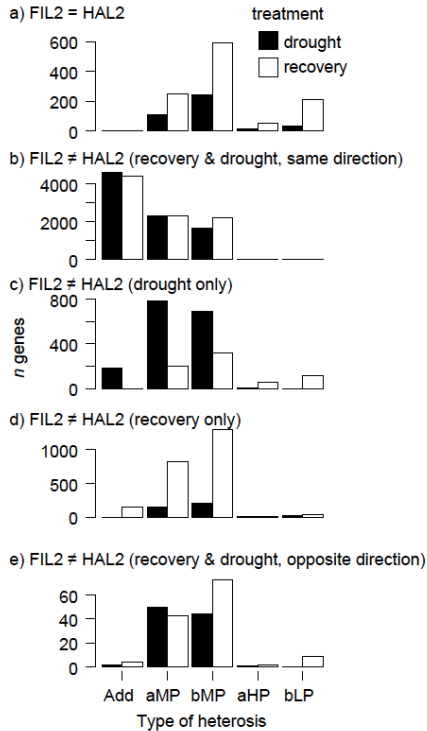

270  
271  
272  
273  
274  
275  
276

**Figure S3: Distribution of heterosis effects across differential expression and GxE categories.** Panel a presents heterosis categorization of conserved genes, while panels b-e depict the heterosis categorizations in the four color categories in Fig. 2b-c. The total number of genes in each category are presented and colored by the treatment: black bars indicate the number of genes in each heterosis bin from the drought treatment, while white filled bars represent the expression categorization from the recovery treatment.

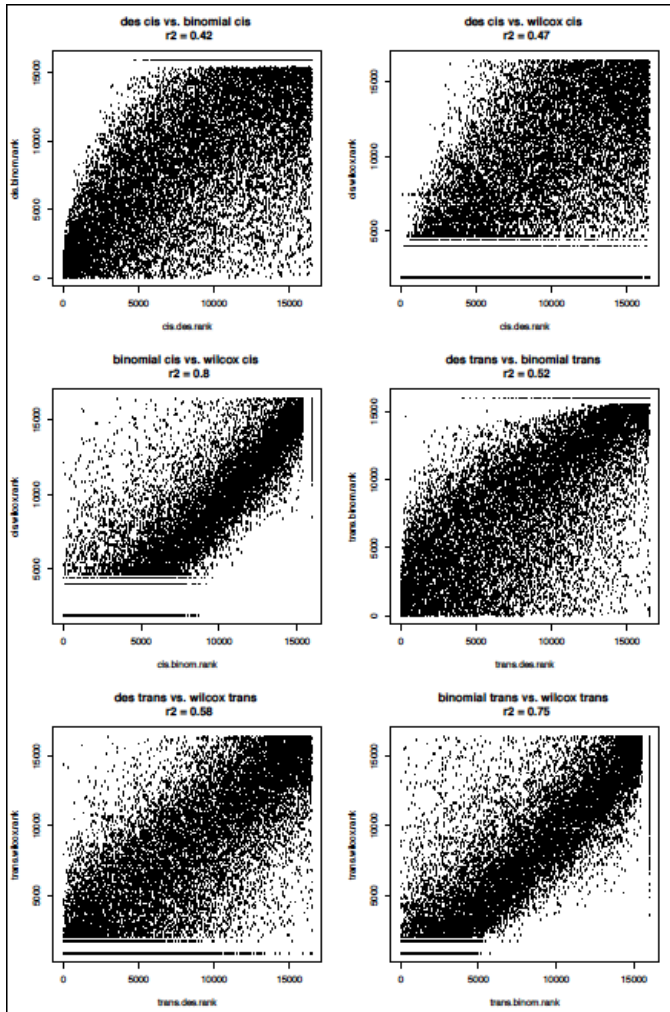

277  
 278  
 279  
 280  
 281  
 282  
 283  
 284  
 285  
 286  
 287

**Figure S4. Comparison between linear modeling and traditional cis-trans test analyses.** Comparison of the inference of cis (a-c) and trans (d-f) between DESeq2 models (“des cis”, “des trans”), mann-whitney test (“Wilcox cis”, “Wilcox trans”) and exact binomial tests (“binomial cis”, “binomial trans”).  $R^2$  values from a linear model implemented in the R base function “lm” accompany the title of each comparison. All tests are completed using only the dry treatment data.



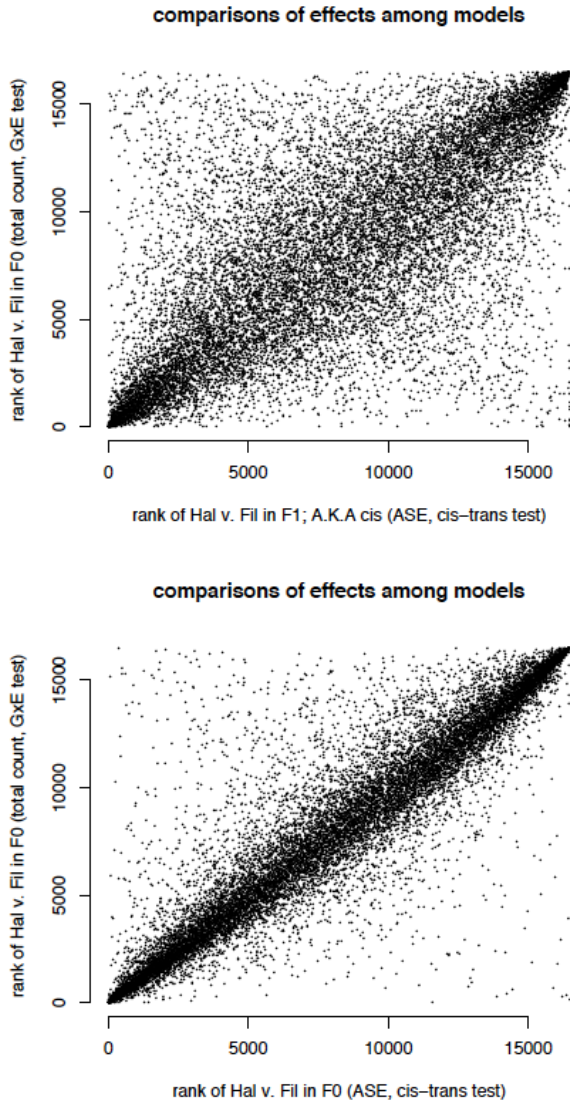

288  
289  
290  
291  
292  
293

**Figure S5. Comparison total and ASE transcript counts in the F<sub>0</sub> and F<sub>1</sub> generations.** The log<sub>2</sub> fold changes derived from total count comparisons between F<sub>0</sub>-FIL2 and F<sub>0</sub>-HAL2 are compared to LFC attributable F<sub>1</sub>-FIL2 vs. F<sub>1</sub>-HAL2 ASE (cis) (panel a) and F<sub>0</sub>-FIL2 vs. F<sub>0</sub>-HAL2 ASE (panel b).

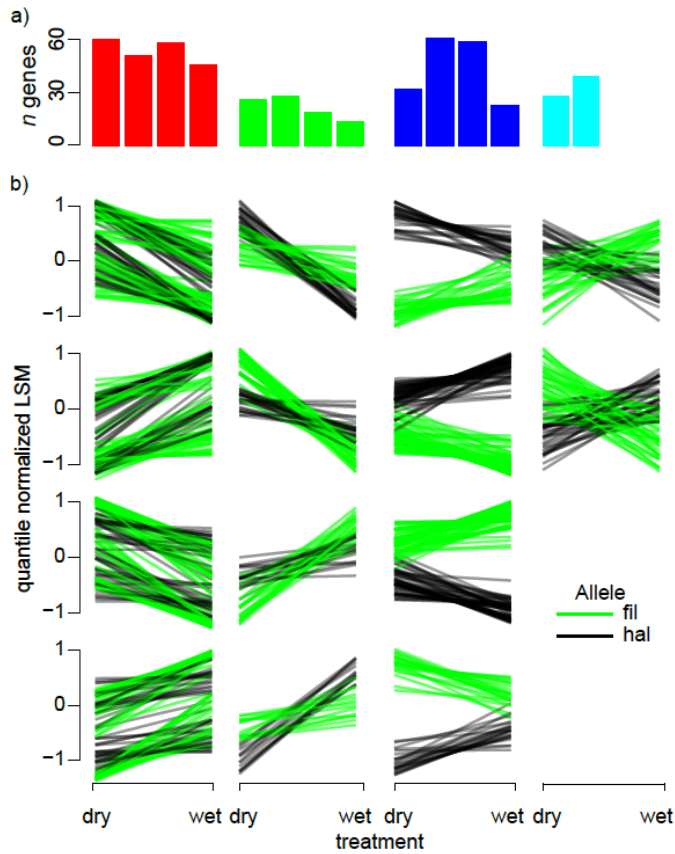

294  
295

296 **Figure S6. Counts and reaction norms of cis\*treatment interactions.** The values plotted are  
297 the quantile normalized least square means of the expression values for each combination of  
298 treatment and cis effect for all genes with significant cis\*treatment interactions. Genes with  
299 significant treatment \* cis interactions are broken out into the 14 possible expression patterns.  
300 The alleles are colored as FIL2 (green) and HAL2 (black). Accompanying the line plots are bar  
301 plots indicating membership in each expression pattern type. Bars from left to right represent  
302 membership of each pattern from top to bottom in each column. Column 1 (red barplot) shows all  
303 genes where the slopes of each allele are in the same direction, but the relative ranks of the alleles  
304 do not change. Column 2 (green barplot) is reserved for genes where the slopes are in the same  
305 direction, but the allelic LSmeans change ranks. Column 3 (blue barplot) genes have opposite  
306 slopes but retain the same ranks, while column 4 (cyan barplot) genes have both opposite slopes  
307 and different ranks.

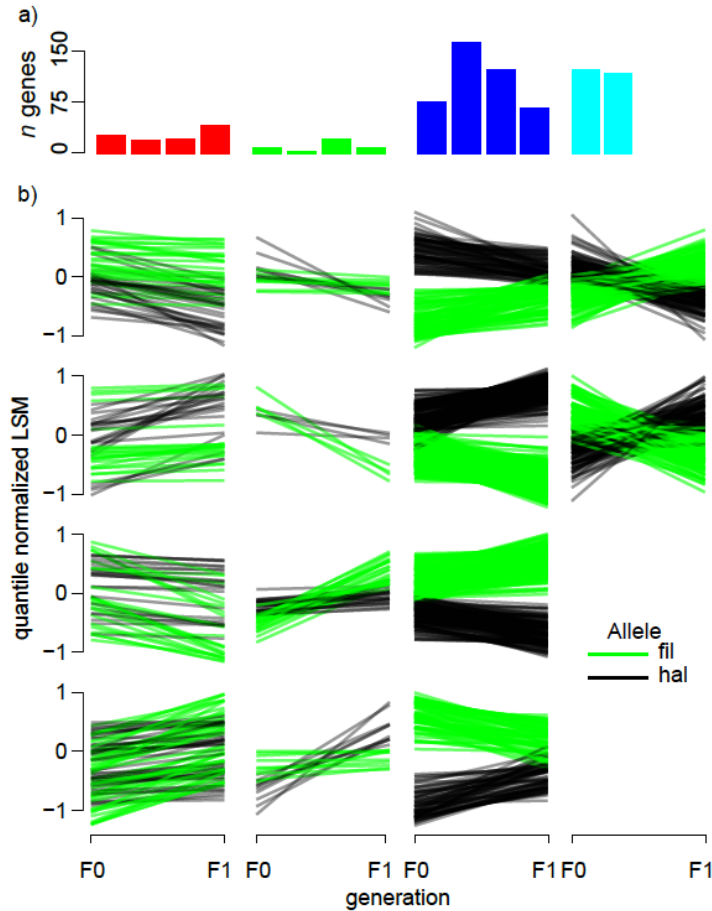

308  
 309  
 310  
 311  
 312  
 313  
 314  
 315  
 316  
 317  
 318  
 319  
 320

**Figure S7. Counts and reaction norms of trans effects.** The values plotted are the quantile normalized least square means of the expression values for each combination of allele and generation (trans) effect for all genes with significant trans effects. Genes with significant trans effects are broken out into the 14 possible expression patterns. The alleles are colored as FIL2 (green) and HAL2 (black). Accompanying the line plots are bar plots indicating membership in each expression pattern type. Bars from left to right represent membership of each pattern from top to bottom in each column. Column 1 (red barplot) shows all genes where the slopes of each allele are in the same direction, but the relative ranks of the alleles do not change. Column 2 (green barplot) is reserved for genes where the slopes are in the same direction, but the allelic LSmeans change ranks. Column 3 (blue barplot) genes have opposite slopes but retain the same ranks, while column 4 (cyan barplot) genes have both opposite slopes and different ranks.

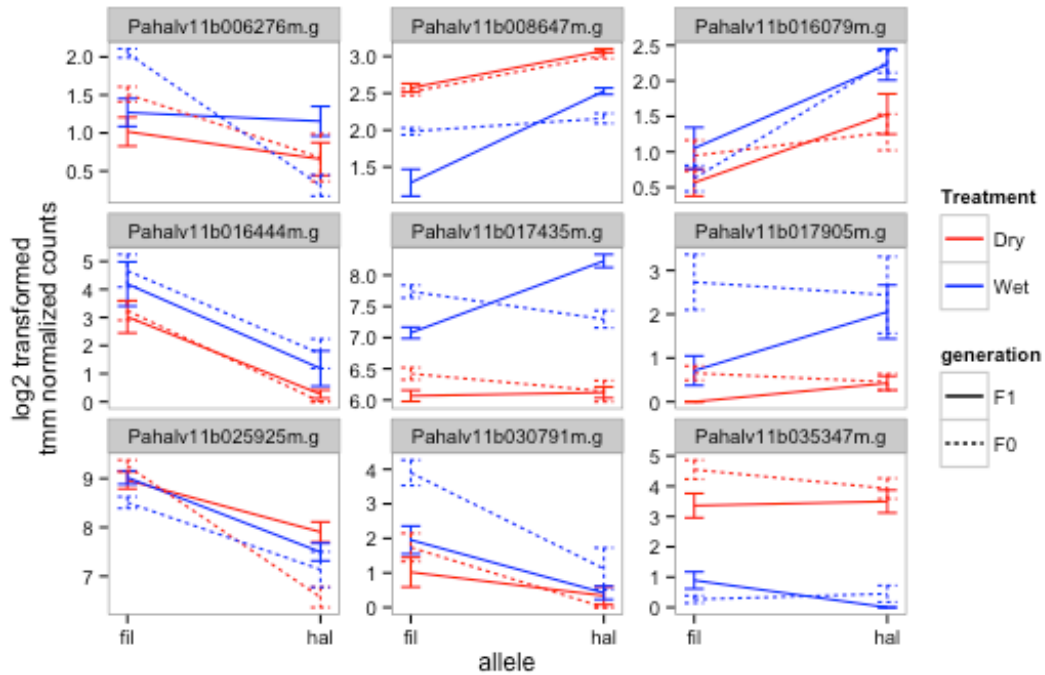

321  
322  
323  
324  
325  
326

**Figure S8. Reaction norms across the 9 genes significantly affected by trans\*treatment interactions.** Mean log<sub>2</sub> transformed, variance stabilized and library size corrected counts are plotted for all genes with significant trans\*trt effects. The Arabidopsis ortholog TAIR gene identifiers and pseudonyms for each gene can be found in Table 2.

327  
328

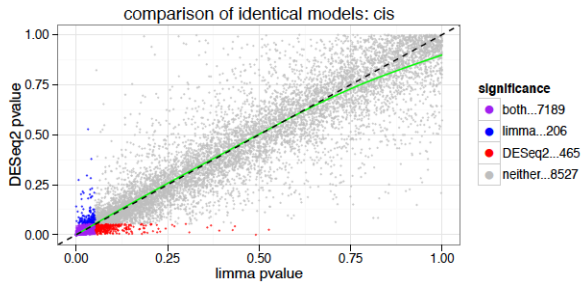

329

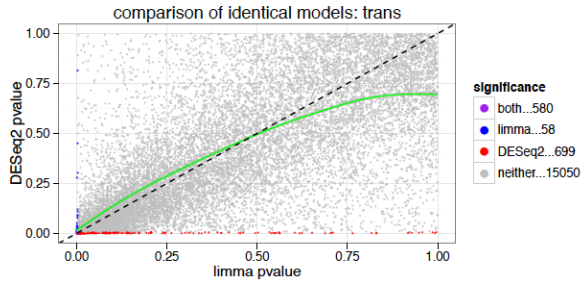

330

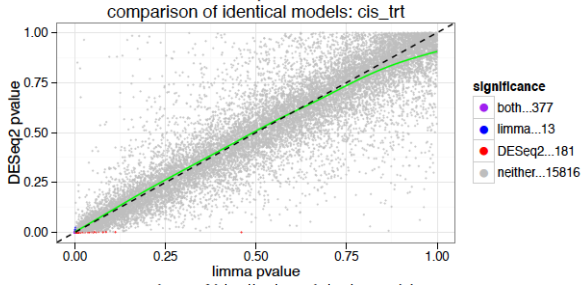

331

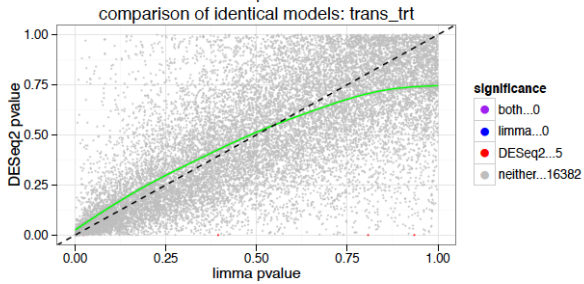

332  
333

334 **Figure S9. Comparison between LIMMA and DESeq2 models for the estimation of cis,**  
 335 **trans and their interactions with treatment.** P-values from each model are plotted on linear  
 336 scales. The 1:1 line is plotted as the dashed black line. A gam (formula:  $y \sim s(x, bs = "cs")$ )  
 337 smoothing curve is overlaid to demonstrate where the density of points lies. Points are colored by  
 338 the method that determined significance. If neither model found significance, the points are grey.  
 339 The number of genes in each category are reported in the legend.

340  
341  
342  
343  
344  
345  
346  
347  
348

349

a)

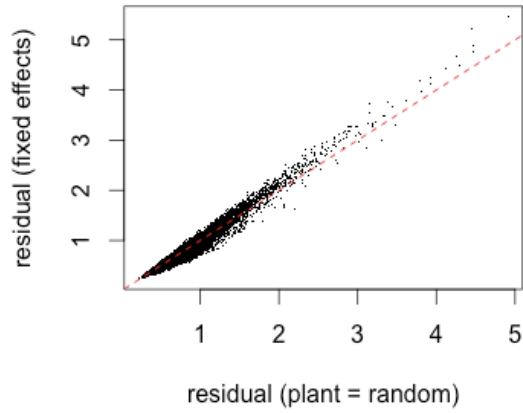

350  
351

b)

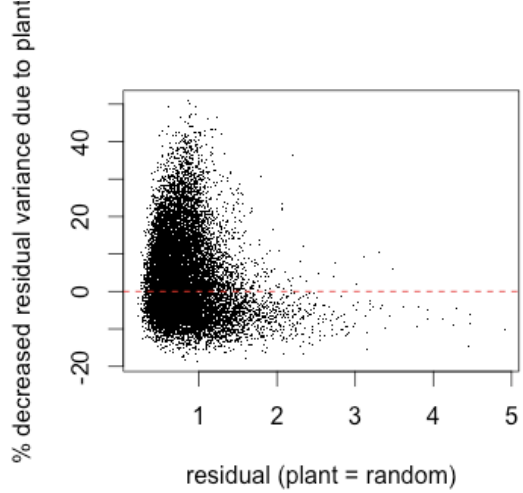

352  
353

c)

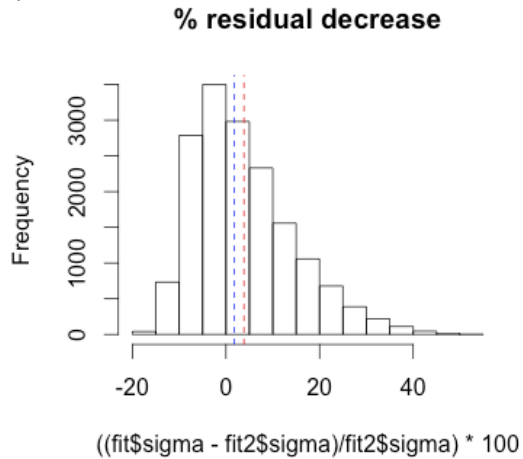

354  
355  
356  
357  
358

**Figure S10:** Comparisons of a fixed effects model in LIMMA to one with PlantID as a blocking factor. There is a general increase in the residual variance for the fixed effects model where the residual variance is very high, but the two models perform equally well with models with lower residual variance (a-b). Panel c displays a histogram of the y-axis in panel b, marking the mean

359 (red) and median (blue) change in the percent decrease in residual variance from the fixed effects  
 360 model to that with plantID as a blocking factor.

361

362

363

364

365

#### **IV: SUPPLEMENTARY TABLE CAPTIONS**

366

367 **Table S1.** Significant GO terms for five categories of genes: 1) drought-responsive, 2) up-  
 368 regulated in drought, 3) down-regulated in drought, 4) cis-by-treatment interaction affects  
 369 expression, 5) trans regulated. FDR-corrected *P*-values are included along with GO id numbers  
 370 and descriptions of each GO term. Terms are ordered by significance.

371

372 **Table S2:** Significantly enriched promoter motifs terms for 7 categories of genes. All motifs  
 373 passing an  $\alpha = 0.05$  threshold are reported. The annotations and references, parsed from the  
 374 newPLACE database, accompany the motifs. The column “TEST” corresponds to the subset of  
 375 genes analyzed: GxE genes with crossing reaction norms (green points, fig 2a) that were either up  
 376 regulated (“gxe.halup.fildown”) or down regulated in HAL2 in drought (“gxe.haldown.filup”), 3)  
 377 Genes with very significant trans effects (“all.trans  $q < 0.01$ ”), 4) genes with significant signatures  
 378 of compensatory evolution (“compensatory”), 5) genes with cis-by-treatment interactions  
 379 (“cis.trt”).

380

381 Column names: *ID* = motif ID (newPLACE), *RANK* = *q* value derived rank of each motif for  
 382 each test, *RAW SCORE* = the affinity test statistic score, *P VALUE* = background corrected, *p*-  
 383 value for the affinity test, *TEST* = the group of genes used to make the test (described above), *Q*  
 384 *VALUE* = *q*-value calculated from the complete *p*-value distribution, *SEQUENCE* = The motif  
 385 sequence, *ACCESSION#* = the newPLACE accession numeric identifier, *DESCRIPTION* = the  
 386 newPLACE description, *ASSOCIATED* = newPLACE associated characteristics, *ORGANISM* =  
 387 newPLACE organism in which the motif was identified, *REFERNCE* = newPLACE databased  
 388 references that documented said motif.

389

390

391

#### **V: SUPPLEMENTARY REFERENCES**

392

393 Bader DM, Wilkening S, Lin G, Tekkedil MM, Dietrich K, Steinmetz LM, Gagneur J. 2015.  
 394 Negative feedback buffers effects of regulatory variants. *Molecular Systems Biology* **11**:  
 395 785–785.

396 Fox J, Weisberg S. 2010. *An R Companion to Applied Regression*. SAGE.

397 Frith MC, Fu Y, Yu L, Chen J-F, Hansen U, Weng Z. 2004. Detection of functional DNA motifs  
 398 via statistical over-representation. *Nucleic Acids Research* **32**: 1372–1381.

399 Higo K, Ugawa Y, Iwamoto M, Korenaga T. 1999. Plant cis-acting regulatory DNA elements  
 400 (PLACE) database: 1999. *Nucleic Acids Research* **27**: 297–300.

401 Love M, Anders S, Huber W, Love MM. 2013. Package “DESeq2.”

402 Love MI, Huber W, Anders S. 2014. Moderated estimation of fold change and dispersion for  
 403 RNA-seq data with DESeq2. *Genome Biol* **15**: 550.

## Lovell et al. Supplementary Material

- 404 Soneson C, Delorenzi M. 2013. A comparison of methods for differential expression analysis of  
405 RNA-seq data. *BMC Bioinformatics* **14**: 91.
- 406 Storey JD. 2002. A direct approach to false discovery rates. *Journal of the Royal Statistical*  
407 *Society: Series B (Statistical Methodology)* **64**: 479–498.
- 408 Storey JD, Taylor JE, Siegmund D. 2004. Strong control, conservative point estimation and  
409 simultaneous conservative consistency of false discovery rates: a unified approach. *Journal*  
410 *of the Royal Statistical Society: Series B (Statistical Methodology)* **66**: 187–205.
- 411
